# Supplementary material for: Falls and long-term care: a report from the care by design observational cohort study
Source: Springer Nature journal article supplement (doi:10.1186/s12875-018-0741-6), 2018-05-24
Supplement: MOESM1 [file 15790320]

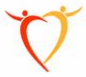

Long-Term Care Comprehensive Geriatric Assessment Form

WNL = Within Normal Limits ASST = Assisted
IND = Independent DEP = Dependent

Cr Cl/eGFR: \_\_\_\_\_

Chief lifelong occupation: \_\_\_\_\_ Education: (years) \_\_\_\_\_

Form containing sections: Cognitive Status, Emotional, Behaviours, Infection Control, Communication, Footcare needed, Dental care needed, Skin Integrity Issues, Strength, Legal NoK, Advanced Directives, Code Status, Marital Status, Family Stress, Mobility, Balance, Elimination, Nutrition, ADLs.

Problems/Past history Medication adjustment required. Associated Medication
1. \_\_\_\_\_ O \_\_\_\_\_
2. \_\_\_\_\_ O \_\_\_\_\_
3. \_\_\_\_\_ O \_\_\_\_\_
4. \_\_\_\_\_ O \_\_\_\_\_
5. \_\_\_\_\_ O \_\_\_\_\_
6. \_\_\_\_\_ O \_\_\_\_\_
7. \_\_\_\_\_ O \_\_\_\_\_
8. \_\_\_\_\_ O \_\_\_\_\_
9. \_\_\_\_\_ O \_\_\_\_\_
10. \_\_\_\_\_ O \_\_\_\_\_
11. \_\_\_\_\_ O \_\_\_\_\_
12. \_\_\_\_\_ O \_\_\_\_\_
13. \_\_\_\_\_ O \_\_\_\_\_
14. \_\_\_\_\_ O \_\_\_\_\_
15. \_\_\_\_\_ O \_\_\_\_\_

Current Frailty Score
Scale
1. Mildly frail [ ] 2. Moderately frail [ ] 3. Severely frail [ ] 4. Very severely ill [ ] 5. Terminally ill [ ]

Physician: \_\_\_\_\_ Date: \_\_\_\_\_
